1 **Locus-specific introgression in young hybrid swarms: drift dominates selection.**

2

3 **Authors:** S. Eryn McFarlane<sup>1,2\*</sup>, Helen V. Senn<sup>1,3</sup>, Stephanie L. Smith<sup>1,4</sup>, Josephine M.  
4 Pemberton<sup>1</sup>

5

6 1. Institute of Evolutionary Biology, School of Biological Sciences, University of Edinburgh,  
7 Edinburgh, UK

8 2. Department of Biology, Lund University, Lund, Sweden

9 3. WildGenes Laboratory, Royal Zoological Society of Scotland, Edinburgh, UK

10 4. The Royal (Dick) School of Veterinary Studies, University of Edinburgh, Easter Bush  
11 Campus, Midlothian, Edinburgh, UK

12 \*for correspondence: [eryn.mcfarlane@gmail.com](mailto:eryn.mcfarlane@gmail.com)

13

14 **Abstract:** Closely related species that have previously inhabited geographically separated  
15 ranges are hybridizing at an increasing rate due to human disruptions. These anthropogenic  
16 hybrid zones can be used to study reproductive isolation between species at secondary  
17 contact, including examining locus-specific rates of introgression. Introgression is expected  
18 to be heterogenous across the genome, reflecting variation in selection. Those loci that  
19 introgress especially slowly are good candidates for being involved in reproductive isolation,  
20 while those loci that introgress quickly may be involved in adaptive introgression. In the  
21 context of conservation, policy makers are especially concerned about introduced alleles  
22 moving quickly into the background of a native or endemic species, as these alleles could  
23 replace the native alleles in the population, leading to extinction via hybridization. We  
24 applied genomic cline analyses to 44997 SNPs to identify loci introgressing at excessive rates  
25 when compared to the genome wide expectation in an anthropogenic hybridizing population  
26 of red deer and sika in Kintyre Scotland. We found 11.4% of SNPs had cline centers that  
27 were significantly different from the genome wide expectation, and 17.6% had excessive  
28 rates of introgression. Based on simulations, we believe that many of these markers have  
29 diverged from average due to drift, rather than because of selection. Future work could  
30 determine the policy implications of allelic-replacement due to drift rather than selection, and  
31 could use replicate, geographically distinct hybrid zones to narrow down those loci that are  
32 indeed responding to selection in anthropogenic hybrid zones.

33 **Introduction:**

34 The rate of hybridization between closely related species that have recently come into  
35 secondary contact is increasing, due to increased human-assisted migration and  
36 environmental change (Parmesan and Yohe 2003, Grabenstein and Taylor 2018). While  
37 hybridization is not necessarily negative (Hamilton and Miller 2016), in many cases  
38 hybridization can cause problems for native species. If F1s are inviable or sterile then  
39 hybridization is a loss of reproductive effort (Allendorf et al. 2001). In contrast, the presence  
40 of viable, fertile hybrid offspring can lead to populations with large numbers of hybrids, and  
41 in the most extreme cases, whole populations comprised only of hybrid individuals  
42 (Allendorf et al. 2001). Biodiversity can be lost through hybridization, either if all remaining  
43 members of a species are hybrids (extinction via hybridization; Allendorf et al. 2001,  
44 Todesco et al. 2016, Allendorf and Luikart 2009, Rhymer and Simberloff 1996), or if  
45 particular endemic alleles are replaced by novel alleles introduced by backcrossing and  
46 driven to fixation via selection (as described by Petit 2004).

47  
48 Hybrid zones, whether naturally occurring or due to human interference, can be used as  
49 ‘natural laboratories’ for research into selection and the genetics of reproductive isolation  
50 between species (Hewitt 1988). The rate of introgression of alleles between species is  
51 expected to be heterogenous across the genome, reflecting variation in selection (Baack and  
52 Rieseberg 2007). Backcrossing coupled with recombination will separate haplotypes that are  
53 commonly found together and create novel haplotypes where selection can act on alleles in  
54 unique genetic backgrounds (Arnold et al. 1999). Alleles that move quickly across the species  
55 barrier are assumed to be under positive selection in their new genetic background, while  
56 alleles that do not introgress between species are candidates for contributing to reproductive  
57 isolation (Baack and Rieseberg 2007). Drift will also be acting on these alleles, particularly if  
58 hybridization is rare or one of the parental populations is small. In these cases, we expect  
59 substantial variation in the degree of introgression across loci, as a result of the sampling  
60 error introduced by reproduction and recombination (Baird, Barton, and Etheridge 2003). If  
61 non-native alleles are increasing in frequency, whether due to selection or drift, we should  
62 apply the precautionary principle until we can be sure that selection will not bring these  
63 alleles to fixation. Identifying those endemic loci that are most likely to be replaced by novel  
64 alleles gives a target for policy makers to reflect upon and consider protecting.

65

66 Geographic cline analyses have been used to determine the extent of hybridization between  
67 two species at a contact zone (Barton and Hewitt 1985, Barton and Gale 1993). Traditionally,  
68 the width of these geographic gradients of allele frequencies can be used to infer selection on  
69 each allele as it introgresses from one species to another across a landscape (Mallet et al.  
70 1990). Recently, *genomic* clines, which replace geographic gradients with hybrid indices,  
71 have been used in the same way, and have the advantage that they can be applied even when  
72 hybrids have a mosaic distribution, or in a hybrid swarm (Gompert and Buerkle 2012, Lexer  
73 et al. 2007, Gompert and Buerkle 2011). Genomic clines use a multinomial regression that  
74 predicts the probability of a particular genotype ( $\theta$ ) given a hybrid index ( $h$ ), where:

75

$$76 \quad \theta = h + (2(h - h^2) \times (\alpha + (\beta(2h) - 1)))$$

77

78 Here,  $\alpha$  is analogous to the location of the cline center and can be interpreted as the direction  
79 of introgression, i.e. a positive  $\alpha$  means excess ancestry from species A to species B and  
80 negative  $\alpha$  means excess ancestry from species B to A.  $\beta$  is analogous to the width of the  
81 cline and can be interpreted as the strength of the barrier to gene flow (Janoušek et al. 2015).  
82 Positive  $\beta$  is interpreted as a narrow cline, where introgression is impeded, and negative  $\beta$  is  
83 a wide cline, where introgression is faster than expected based on the genomic expectation  
84 (Gompert and Buerkle 2009).

85

86  $\alpha$  and  $\beta$  are not explicitly expected to covary with each other (although they are not fully  
87 independent), nor are  $\alpha$  and  $\beta$  necessarily expected to covary with divergence estimates  
88 between the parental species in the system such as  $F_{st}$  (Charlesworth 1998). However, those  
89 loci that are both highly diverged between species (i.e. high  $F_{st}$ ) and slow moving (large  
90 positive  $\beta$ ) are good candidates for loci involved in reproductive isolation (Gompert and  
91 Buerkle 2009, Lexer et al. 2007), particularly if they are not expected to be highly diverged  
92 because of other genomic constraints (i.e. recombination cold spots; Burri et al. 2015,  
93 Cruickshank and Hahn 2014). Studies of naturally occurring hybridization regularly find  
94 many markers, spread across the genome, with significant  $\alpha$  and  $\beta$  estimates, and typically  
95 find more loci that are significant for  $\alpha$  than  $\beta$  loci (but see (Pulido-Santacruz, Aleixo, and  
96 Weir 2018) who found no divergent  $\alpha$  or  $\beta$  SNPs between either *Willisornis* or  
97 *Xiphorhynchus* species pairs). For example, Janoušek (et al. 2015) found that as many as 70%  
98 of SNPs diverged from genome-wide expectations in a *mus* hybrid zone, Parchman (Parchman

99 et al. 2013) using 59 100 SNPs found more than 1000 significant  $\alpha$  SNPs and more than 400  
100 significant  $\beta$  SNPs between *Manacus candei* and *M. vinellinus*, and (Sung et al. 2018)  
101 reported ~30% of 45384 SNPs with significantly diverged  $\alpha$  and ~1% of SNPs with  
102 significantly diverged rates of  $\beta$  between *Iris hexagona* and *I. fulva*. The vast number of  
103 reported genome wide excess  $\alpha$  and  $\beta$  SNPs from many systems are unlikely to all be related  
104 to selection, especially given that selection must be extremely strong to be detected at the  
105 genome-wide level in artificial selection studies (e.g. Castro et al. 2019). Simulations of  
106 admixed populations that varied population sizes found that, particularly with a population  
107 size of only 100, both  $\alpha$  and  $\beta$  estimates could be quite variable, and when loci under  
108 selection were simulated, particularly when there was weak selection and low levels of  
109 admixture, there were high false discovery rates (Gompert and Buerkle 2011). Before  
110 genomic regions can be considered candidates to be responding to selection, careful  
111 consideration of expectations due to non-selective forces must be undertaken (Gompert and  
112 Buerkle 2011).

113

114 The red deer (*Cervus elaphus*) is an emblematic animal native to Scotland. It was named as  
115 one of ‘ Scotland’s big 5’ in a campaign to increase engagement with wildlife ran by Scottish  
116 government between 2013 and 2015 (Scottish Wildlife Trust, 2013), known for its large size,  
117 large antlers and bright red summer coat. Red deer are abundant through much of Scotland  
118 and they are popular for hunting (deer stalking) and with tourists and unpopular for their  
119 ecological impacts, particularly on young trees. Physically smaller Japanese sika (*C. nippon*)  
120 were introduced to Scotland in the late 19<sup>th</sup> century, and have since hybridized with the red  
121 deer (Ratcliffe 1987). On the Kintyre peninsula, Argyll, more than 40% of sampled  
122 phenotypic red deer and sika individuals are hybrids according to 50 000 SNP markers, with  
123 the majority being the result of multiple generations of backcrossing (McFarlane et al. 2020).  
124 Hybrid deer tend towards an intermediate phenotype and thus are smaller, have smaller  
125 antlers, and are more likely to have the spots typical of sika than parental species red deer  
126 (Senn, Swanson, et al. 2010). While there is a trend from red deer in the north to sika in the  
127 south of the peninsula, the distribution of hybrids does not follow a cline, being instead  
128 concentrated in specific areas (Senn, Barton, et al. 2010). Additionally, in a study using 20  
129 microsatellite markers, there was no evidence that the number of hybrid individuals was  
130 changing over a period of 15 years (Senn, Barton, et al. 2010).

131

132 In this study, we sought evidence among red-sika hybrids that specific genome regions have  
133 introgressed more or less than expected under neutrality, in ways that might be interpreted as  
134 being due to selection. We used 50K SNP genotypes in 222 Kintyre hybrid deer to estimate  
135 genomic clines and show that, as in the other studies cited above, many loci exceed  
136 background expectation in terms of direction of introgression  $\alpha$  and cline width  $\beta$ . We then  
137 conduct population genetic simulations to investigate admixture scenarios that shed light on  
138 the likely roles of drift and selection in generating these results.

139

## 140 **Methods:**

### 141 *Sample Collection*

142 513 deer samples were collected from 15 forestry sites in the Kintyre region of Scotland  
143 between 2006 and 2011. These samples were collected by the Forestry Commission Scotland  
144 (now Forestry and Land Scotland) as part of normal deer control measures. Deer were shot as  
145 encountered, without regard to the phenotype of the animal (Smith et al. 2018a). Sample  
146 collection consisted of ear tissue and has been previously described elsewhere (Senn and  
147 Pemberton 2009, Smith et al. 2018a). Samples were either preserved in 95% ethanol or  
148 frozen for long-term storage.

149

### 150 *DNA extraction and SNP Genotyping*

151 We used the DNeasy Blood and Tissue Kit (Qiagen) according to the manufacture's  
152 instructions to extract DNA for SNP analysis, with the exception that we eluted twice in 25 $\mu$ l  
153 buffer TE to obtain DNA at a sufficiently high concentration. Concentration was assayed  
154 using the Qubit™ dsDNA BR Assay Kit (Invitrogen). Any samples below 50 ng/ $\mu$ l were  
155 vacuum-concentrated, re-extracted or omitted from SNP analysis.

156

157 SNPs were genotyped on the Cervine Illumina iSelect HD Custom BeadChip using an iScan  
158 instrument following manufacturer's instructions (as in (Huisman et al. 2016)). When this  
159 SNPchip was developed, SNPs were spaced evenly throughout the genome based on the  
160 bovine genome, with which the deer genome has high homology. We used a positive control  
161 twice on each 96 well plate to check for consistency between batches (Huisman et al. 2016).  
162 We scored genotypes using GenomeStudio using the clusters from Huisman et al (2016), and  
163 clustered SNPs manually if they could not be resolved in these clusters (McFarlane et al.  
164 2020). All quality control was done in PLINK (Purcell et al. 2007). We excluded individual

165 samples with a call rate of less than 0.90, and deleted loci with a minor allele frequency of  
166 less than 0.001 and/or a call rate of less than 0.90. We did not exclude SNPs based on Hardy  
167 Weinberg Equilibrium (HWE) as highly differentiated markers between red and sika are not  
168 expected to be in HWE. When the chip was designed, the majority of the 53K SNPs included  
169 were selected to be polymorphic in red deer, 4500 SNPs were selected to be diagnostic  
170 between either red deer and sika or red deer and wapiti (*Cervus canadensis*) (Brauning et al.  
171 2015). Of these 629 SNPs are diagnostic and an additional 3205 SNPs are ancestry  
172 informative markers (hereafter together as AIMs) in Kintyre. These AIMs were determined  
173 based on having extreme allele frequency differences where the differences in frequency  
174 between the two populations was more than 0.95 (McFarlane et al. 2020). While one pool of  
175 12 sika from Kintyre were whole genome sequenced for the development of this SNP chip,  
176 the focus was on polymorphic SNPs in red deer on Rum (Brauning et al. 2015). A high  
177 density deer linkage map confirms high homology between cervine and bovine genomes  
178 (Johnston et al. 2017); in the present study we have used the bovine map as this allows use of  
179 all of the SNPs, including those that are not polymorphic in red deer, and thus were difficult  
180 to map.

181

### 182 *Diversity*

183 We estimated genetic divergence between red deer and sika in Kintyre using the hierfstat  
184 package in R (Goudet 2005). We compared only individuals that previous analysis identified  
185 as pure species red deer or sika (McFarlane et al. 2020) and we estimated  $F_{st}$  at each  
186 individual locus following Nei (Nei 1987). We used a linear model in R (Team 2013) with  
187  $F_{st}$  as the response variable, and the X chromosome as a reference to ask how the  $F_{st}$  of  
188 SNPs on the autosomes differed from those SNPs on the X chromosome.

189

### 190 *Bayesian genomic clines*

191 We wanted to find loci with alleles that had introgressed at rates that deviated from genome  
192 wide expectations, as those alleles that move faster than expected might be under selection in  
193 the novel parental genomic background and those loci that move slower might be related to  
194 post zygotic reproductive isolation (Lexer et al. 2007). We used the program bgc (Gompert  
195 and Buerkle 2012) to estimate Bayesian genomic clines across the hybrid individuals in our  
196 population. bgc compares the genotype of each locus in each individual to that individual's

197 hybrid index to estimate values of  $\alpha$ , which is comparable to a geographic cline center and  $\beta$ ,  
198 comparable to a geographic cline slope (Gompert and Buerkle 2012).

199

200 We assigned individuals to three different populations based on their ADMIXTURE  
201 estimates and whether the credible intervals from ADMIXTURE overlapped 0 (sika) or 1  
202 (red deer). If an individual's credible intervals overlapped neither 0 or 1 it was considered a  
203 hybrid (McFarlane et al. 2020). Red deer and sika were each assigned to parental populations,  
204 and all admixed individuals were put into a 'hybrid population'. This is in contrast to some  
205 previous analyses where individuals are separated based on whether they are from a  
206 population in which admixture occurs (Taylor et al. 2014, Trier et al. 2014, Royer, Streisfeld,  
207 and Smith 2016). We calculated allele frequencies for the two parental populations using  
208 PLINK (Purcell et al. 2007), while hybrid genotypes were considered individually. We ran  
209 bgc 5 independent times, for 50000 iterations each time, with a burnin of 25000 and a  
210 thinning interval of 200, and assessed convergence by eye. To be as conservative as possible  
211 when determining which loci significantly deviated from the genome wide expectation, we  
212 used the widest possible confidence intervals for each locus from the 5 chains (Janoušek et al.  
213 2015). Loci with credible intervals that did not overlap with 0 are referred to as 'excess' loci.  
214 Additionally, we assumed a normal distribution for each  $\alpha$  and  $\beta$  with the same mean and  
215 standard deviation as the empirical data. We then asked which SNPs had  $\alpha$  or  $\beta$  estimates in  
216 the 2.5% upper and lower tails of this distribution. Those loci outside of the 95% distribution  
217 are referred to as 'outlier loci'.

218

### 219 *SLiM simulations*

220 We wanted to determine the impact of population size and history on the potential role of  
221 drift in hybridized populatons. Theoretically, there is an expectation that rare, recent  
222 hybridization should result in extremely variable rates of introgression across the genome  
223 (Baird, Barton, and Etheridge 2003). We used SLiM (Haller and Messer 2017) to build some  
224 simple models that varied the rate of admixture, the length of time admixture has been  
225 occurring and the abundance ratio of each parental type population (1:1 or 3:1). We simulated  
226 1000 individuals with a single chromosome of  $1e^7$  markers, split into two populations of either  
227 500 each or 250 and 750, and allowed both populations to evolve for 3000 generations with a  
228 standard rate of neutral mutation (0.01), typically resulting in an  $F_{st}$  between 0.40 and 0.60.  
229 Note that we did not simulate any markers to be under positive selection. We then allowed

230 migration and interbreeding between the two populations at a given rate (0.002, 0.02, or 0.2)  
231 for a given number of generations (10, 100 or 1000). We then took the SNPs for all  
232 individuals and put them through our PLINK-ADMIXTURE-bgc pipeline (as above). One  
233 deviation from the above pipeline is that due to computational constraints bgc was only run  
234 for 2500 iterations, with a burnin of 200 iterations and a sampling interval of 2. We ran bgc 5  
235 times for each simulation, and, as with the empirical analyses, categorized loci based on the  
236 widest possible CIs. As bgc analyses may not have converged in a such a short period of  
237 time, this could lead to wider CIs than if convergence had occurred in all chains, making this  
238 analysis conservative with respect to finding excess loci. We ran each simulation 50 times to  
239 determine what proportion of markers significantly deviated from the genome wide  
240 expectation. We did not compare to the distribution of the  $\alpha$  and  $\beta$  to identify outlier loci, as  
241 this is less commonly done in the literature, and is harder to standardize across studies.

242

## 243 **Results:**

### 244 *Diversity*

245  $F_{st}$  varied widely among markers (Figure 1a) and across the genome (Supplementary Figure  
246 1). While each chromosome had SNPs with  $F_{st}$  estimates that ranged from 0 to 1 (average  
247 autosomal  $F_{st} = 0.499 \pm 0.33$ ), the X chromosome had a higher  $F_{st}$  on average than all other  
248 chromosomes with the exception of Chromosome 25 (Figure 1b, Supplementary Table 1).

249

### 250 *bgc*

251 We found substantial variation between loci in the location and rate of genomic clines  
252 between red deer and sika. Positive  $\alpha$  can be interpreted as extreme introgression from red  
253 deer to sika, while negative  $\alpha$  is extreme introgression from sika to red deer. While most of  
254 the 44997 SNPs that we examined were not excessively different from the genome-wide  
255 expectations there were many SNPs that were excessive compared to the genome wide  
256 expectation based on hybrid indices. Specifically, 691 (324 negative and 367 positive) SNPs  
257 were in excess for  $\alpha$  estimates, but not for  $\beta$  estimates, 3483 (255 negative and 3228 positive)  
258 SNPs had  $\beta$  estimates that were in excess but not  $\alpha$  estimates and 4437 other SNPs (60  
259 negative  $\alpha$  and  $\beta$ , 0 negative  $\alpha$  and positive  $\beta$ , 3034 positive  $\alpha$  and negative  $\beta$ , 1343 positive  
260  $\alpha$  and  $\beta$ ) were in excess for both  $\alpha$  and  $\beta$  (Table 1). 1168 SNPs were  $\alpha$  outliers but not  $\beta$   
261 outliers (1 negative, 1167 positive), 678 SNPs (568 negative, 110 positive) were outliers for  $\beta$   
262 but not  $\alpha$  and 2450 were outliers for both  $\alpha$  and  $\beta$  (0 negative  $\alpha$  and  $\beta$ , 0 negative  $\alpha$  and



263 positive  $\beta$ , 2438 positive  $\alpha$  and negative  $\beta$ , 12 positive  $\alpha$  and  $\beta$ ). We have found substantially  
264 more excess loci with positive  $\alpha$  estimates than negative  $\alpha$  estimates (4744 vs 384) and  
265 substantially more positive  $\alpha$  outliers than negative outliers (3617 vs 1). We found more  
266 positive than negative  $\beta$  excess SNPs (4571 vs 3349), but substantially fewer positive than  
267 negative  $\beta$  outlier SNPs (122 vs 3006). Excess SNPs (for either  $\alpha$  or  $\beta$ ) are spread across the  
268 entire genome, and occur on every chromosome (Figures 2a&b), as do outlier SNPs.

269

270 When we examined only those diagnostic and ancestry informative markers we have  
271 previously identified (n=3793; McFarlane et al. 2020), we found 226 (5 negative and 221  
272 positive) that were significantly  $\alpha$  excess but not  $\beta$  excess, 87 (14 negative and 73 positive)  
273 that were significantly  $\beta$  excess but not  $\alpha$ , and 2315 (2 negative  $\alpha$  and  $\beta$ , 0 negative  $\alpha$  and  
274 positive  $\beta$ , 2285 positive  $\alpha$  and negative  $\beta$ , 28 positive  $\alpha$  and  $\beta$ ) that were both  $\alpha$  and  $\beta$   
275 excess. Of the AIMs, we found 346 (0 negative and 346 positive) that were  $\alpha$  but not  $\beta$   
276 outliers, 313 (309 negative and 4 positive) that were  $\beta$  but not  $\alpha$  outliers and 1870 SNPs (0  
277 negative  $\alpha$  and  $\beta$ , 0 negative  $\alpha$  and positive  $\beta$ , 1870 positive  $\alpha$  and negative  $\beta$ , 0 positive  $\alpha$   
278 and  $\beta$ ) that were significant outliers for  $\alpha$  and  $\beta$  (Table 1). As was the case when we used all  
279 the SNPs, we found many more excess loci with positive  $\alpha$  than negative  $\alpha$  (2534 vs 7) and  
280 many more positive than negative  $\alpha$  outlier AIM SNPs (2234 vs 0), suggesting more extreme  
281 introgression from red deer into sika than from sika into red deer. We found fewer positive  
282 than negative excess  $\beta$  AIM SNPs (101 vs 2301), and fewer positive than negative outlier  $\beta$   
283 AIM SNPs (4 vs 2179). Similarly to when we examined all SNPs, excess and outlier  $\alpha$  and  $\beta$   
284 SNPs were found across the genome. In contrast to when we examined all SNPs, there was a  
285 substantially higher proportion of AIM SNPs that were different than the genome wide  
286 expectation (69.3% DM&AM significant excess vs 19.1% from all SNPs and 65.5% AIM  
287 significant outlier vs 9.5% from all SNPs).

288

### 289 *SLiM Simulations*

290 Across the scenarios that we simulated, we found that the majority of simulated loci were not  
291 significant for either  $\alpha$  or  $\beta$  estimates. However, we did find that in cases where there had  
292 only been 10 generations of admixture, and a low level of hybridization, most loci had either  
293 a positive or negative  $\beta$  estimate, suggesting faster or slower than expected movement  
294 through the cline (Figure 4, panels 'sle', 'slo' and 'sme'). While the proportion of loci with  
295 significant  $\beta$  decreased with increasing number of generations and increased admixture,

296 there are loci with significant  $\beta$  found in every other simulated scenario, with sometimes as  
297 many as 40% of loci introgressing at extreme rates when compared to the average rate of  
298 introgression across the entire genome. Additionally, in scenarios where hybridization has  
299 been progressing for longer (Figure 4, m and l rows), as many as 15% of loci have negative  
300 alpha estimates. This appears to be more extreme with increased rates of hybridization.

301

### 302 **Discussion:**

303 Using 44997 SNPs, we found extremely variable  $F_{st}$  between red deer and sika across all  
304 chromosomes, although the X chromosome had a substantially higher  $F_{st}$  than the autosomes.  
305 We also found 5128  $\alpha$  excess SNPs, of which 3618 are outliers and 3618  $\beta$  excess SNPs of  
306 which 3128 are outliers (Table 1). When we compared these excess and outliers SNPs to our  
307 list of AIMs, we found a high proportion of AIM loci were excess and/or outliers (Table 1).  
308 This suggests that some caution should be used when interpreting the results of genomic  
309 clines of diagnostic or ancestry informative markers, as there could be a relationship between  
310 informativeness and extreme clines of these markers.

311

312 We found 4474 positive excess  $\alpha$  SNPs (3617 outliers), and 384 negative excess  $\alpha$  SNPs (1  
313 outlier), which suggest cline means that have moved from red deer to sika (positive alpha) or  
314 sika to red deer more than expected based on the genomic expectation. This is in strong  
315 contrast to our simulations, which only found excess  $\alpha$  loci in such high proportions when  
316 hybridization had been on-going for 1000 generations. Previous simulations using *bgc* have  
317 found substantial variation in  $\alpha$  estimates when smaller sample sizes were simulated, even if  
318 the simulation was for only 25 generations with a admixture rate of 0.2 (Gompert and  
319 Buerkle 2011). Our empirical data set contains only 222 hybrid individuals, which is a small  
320 population compared to most of our simulations. It should be noted that the hybrid population  
321 size in our simulations varied (between approximately 45 and approximately 800), as it was a  
322 function of the admixture rate, and the stochasticity built into these individual based  
323 simulations. In any case, the 222 deer hybrids from Kintyre are substantially fewer than the  
324 500 or 1000 hybrid individuals that were simulated in the best performing models by  
325 Gompert and Buerkle (2011). This is good reason to be cautious about interpreting excess or  
326 outlier  $\alpha$  estimates as evidence for selection on these loci.

327

328 We found substantially more significant positive than negative excess and outlier  $\alpha$ 's,  
329 indicating that there are more alleles that have shifted from red deer to sika than from sika to  
330 red deer. There are three possible explanations for this. First, there could be asymmetry in  
331 backcrossing, such that there is more backcrossing into sika than there is into red deer. This  
332 was previously indicated in an analysis of microsatellite data by Goodman and colleagues  
333 (Goodman et al. 1999) who estimated that the rate of backcrossing into sika was twice the  
334 rate of backcrossing into red deer ( $H=0.002$  vs.  $H=0.001$ ), although based on mitochondrial  
335 DNA, it is clear that backcrossing does proceed in both directions (Smith et al. 2018b).  
336 Second, the pattern of increased positive vs. negative  $\alpha$  estimates could be due to marker  
337 selection. The SNP chip we used was mainly designed to provide polymorphic loci for  
338 studies within red deer, and just 2250 SNPs that were selected to be diagnostic between red  
339 deer and sika (Brauning et al. 2015), although ultimately only 629 SNPs are diagnostic in our  
340 study population (McFarlane et al. 2020). These two patterns are difficult to distinguish  
341 between in our system. The sika population is less diverse than the red deer population due to  
342 a demographic history of bottlenecks and the genomic tools have been designed for use in red  
343 deer. These two processes together make it more difficult to document what could be shared  
344 alleles from sika into red deer, whereas it is easier to document the introgression of private  
345 alleles from a large, outbred, polymorphic population of red deer into sika. Further, it's  
346 difficult to quantify the relative contribution of each of these processes to the bias that could  
347 exist. The third possible mechanism explaining the seemingly higher proportion of red deer  
348 alleles introgressing into sika than in the other direction is that, as sika are an introduced  
349 species in the UK, it is possible that some alleles that are introgressing from red deer to sika  
350 are indeed the result of adaptive introgression, because they increase the fitness of hybrids.  
351 Adaptive introgression can involve a faster response to selection in a new environment than  
352 selection on a new mutation since the allele is already proven, albeit in a different  
353 background (Hedrick 2013), and has been suggested to be a potentially positive conservation  
354 outcome of anthropogenic hybridization (Hamilton and Miller 2016). Without fitness  
355 estimates, it's extremely difficult to demonstrate adaptive introgression in wild populations  
356 (Taylor and Larson 2019), making it difficult to tease apart these three possibilities.  
357  
358 Empirically, we found 3349 (~6.7%) SNPs with a negative, excess  $\beta$  estimate (3006 negative  
359  $\beta$  outliers), suggesting that these SNPs were introgressing faster than expected between red  
360 deer and sika. While red deer and sika have been hybridizing in Scotland for at least 6-7

361 generations, it is possible they may have hybridized prior to introduction to Scotland, as  
362 hybridization was reported in the Irish source population before animals were introduced to  
363 Kintyre (Powerscourt 1884). Either way, this is a case of recent hybridization. The rate of  
364 backcrossing has previously been estimated using 11 microsatellite markers as 0.002 into sika  
365 and 0.001 into red deer (Goodman et al. 1999), which is consistent with our simulated ‘low’  
366 admixture parameter. The ratio of red deer to sika is variable across Kintyre (Smith et al.  
367 2018b). Thus, our empirical work is most consistent with the ‘sle’ or the ‘slo’ simulations,  
368 where we found that most SNPs were excess  $\beta$ , either positive or negative (Figure 4). Thus,  
369 we found substantially fewer significant negative  $\beta$  SNPs than we may have expected from  
370 the simulations, highlighting that these simulations are just a toy example, rather than a  
371 highly accurate simulation of this natural system. For comparison, many studies of  
372 hybridization that have used *bgc* have not found significant  $\beta$  estimates. For example, a  
373 recent study of ibis hybridization using diagnostic markers found no significant negative  $\beta$   
374 SNPs, in spite of the ibis hybrid zone probably only being 60 or so years old (Oswald et al.  
375 2019). In contrast, a study of recent sole (*Solea aegyptiaca* x *S. senegalensis*) hybridization  
376 found 52% of all loci exhibited an extreme  $\beta$  value, with 26% of all loci exhibiting a negative  
377  $\beta$  estimate (Souissi et al. 2018). For an example of research on an older hybrid zone, black-  
378 tailed deer and mule deer have been hybridizing for approximately 8000 years, and when  
379 genomic clines were estimated using 95 SNPs, four were found to have extreme  $\beta$  estimates  
380 (two positive and two negative; Haines et al. 2019). Overall, comparison of genomic cline  
381 estimates across studies and taxa is difficult, particularly given the expectation for extreme  $\beta$   
382 values due to drift (Baird, Barton, and Etheridge 2003), the potential for extremely different  
383 results depending on the marker panel used (Table 1), the age of a hybrid zone, and rate of  
384 admixture between species (Figure 4). As such, a more comprehensive meta-analysis  
385 approach is likely needed to understand factors driving genomic cline variation across taxa.  
386

387 Although we cannot be sure that any loci demonstrate selection in our study system we found  
388 a number of SNPs that exhibited extreme introgression as judged by  $\alpha$  or  $\beta$  estimates. For  
389 example, there are 298 SNPs with  $F_{st} = 1$  and a significantly negative  $\beta$ , suggesting that they  
390 are highly diverged between the two species, and are introgressing more quickly than would  
391 be expected in the hybrid populations. This is what we would expect if there was adaptive  
392 introgression. We didn’t find any SNPs with  $F_{st} = 1$  and significantly positive  $\beta$ , as we might  
393 have expected to detect if there were loci with large effects on reproductive isolation.

394 However, simulations of genomic clines that included epistatic interactions on reproductive  
395 isolation, (i.e. Bateson-Dobzhansky-Muller interactions; Dobzhansky 1937, Muller 1940) are  
396 difficult to detect using *bgc* (Gompert and Buerkle 2011), so we would not claim the lack of  
397 evidence in this case as evidence of the absence of genes involved in reproductive isolation in  
398 this system. Substantially more work is needed to address this question.

399

400 There is an expectation that when there is recent, rare hybridization, the genomic outcome of  
401 introgression is extremely stochastic (Baird, Barton, and Etheridge 2003), and it has  
402 previously been noted how difficult it is to derive a null distribution for locus-specific  
403 introgression (Gompert and Buerkle 2011). Drift can substantially increase or decrease the  
404 frequency of different blocks, in the complete absence of selection. This is consistent with  
405 what we saw in our SLiM simulations, where, when we simulated 10 generations of  
406 admixture with a rate of admixture of 0.002, we found in some cases that 50% of markers had  
407 wider clines and 50% of markers had narrower clines than predicted from the genome-wide  
408 expectation (Figure 4). As noted above, the hybrid population sizes also varied with  
409 admixture rate, particularly when hybridization was rare and had only been ongoing for 10  
410 generations (scenarios *sle* and *slo*). This is consistent with untargeted sampling in wild  
411 populations, as, if hybridization is recent and rare, there will be proportionately fewer hybrids  
412 in the population. This confirms that extreme  $\beta$  estimates should not be taken as evidence of  
413 selection (Gompert and Buerkle 2012), or of adaptive introgression (Taylor and Larson  
414 2019), as this introgression happens in the absence of selection. This is particularly true when  
415 hybridization is recent and rare, leading to relatively few hybrids in the population. Previous  
416 neutral simulations of 25 generations of admixture with an admixture rate of 0.2, comparable  
417 to our *she* and *sho* simulations but with a simulated population size of 100, found substantial  
418 variation in the estimated  $\alpha$  or  $\beta$  estimates, with  $\alpha$  being more variable than  $\beta$  (Gompert and  
419 Buerkle 2011). These simulations found that  $\alpha$  or  $\beta$  were less variable when the population  
420 sizes simulated were 500 or 1000, although some outlier  $\alpha$  or  $\beta$  loci were still found in some  
421 simulations in these cases (Gompert and Buerkle 2011). As this pattern was less extreme  
422 when hybridization had been progressing for many generations (i.e. 100 or 1000), this  
423 provides an additional rationale for researchers to quantify the length of time admixture has  
424 been occurring in their system prior to drawing conclusions (McFarlane and Pemberton 2019,  
425 Loh et al. 2013). The strength of evidence for adaptive introgression from genomic clines is,  
426 therefore, weak in more recently admixed systems, including many examples of

427 anthropogenic hybridization. To make the case that adaptive introgression is occurring,  
428 particularly in a recent case of anthropogenic hybridization, studies must incorporate  
429 independent fitness estimates to demonstrate selection.

430

431 To conserve a species in the presence of hybridization, we must first quantify both the  
432 number of individuals in the population that are hybrids, and the proportion of alleles that  
433 could be replaced by introduced alleles, i.e. in line with the gene-based theory of  
434 conservation (Petit 2004). In our study area, we found approximately 43% of individuals are  
435 hybrids (McFarlane et al. 2020) and in the present study, we have identified 60 SNPs with  
436 both an excessive negative  $\alpha$  and excessive negative  $\beta$  estimate, indicative of introgressive  
437 alleles moving from sika to red deer faster than expected. These SNPs are spread across 26  
438 different chromosomes. Whether the pattern of these SNPs is the result of selection or drift, it  
439 is still the case that there are sika alleles that are spreading into red deer populations via  
440 hybridization faster than those at other loci. These are the genome regions that are of  
441 potential conservation concern for Scottish red deer as these alleles may most quickly replace  
442 their red deer alternates, although it should be noted that red deer are a species of least  
443 concern (IUCN 2020). Techniques such as admixture mapping could be used to try to link  
444 SNPs to phenotypes of interest (Buerkle and Lexer 2008), and then cross check these SNPs  
445 against those introgressing fastest. Such gene-targeted conservation is unlikely to be  
446 successful (Kardos and Shafer 2018), particularly since many of the traits of interest in red  
447 deer (e.g. redness, antler size and shape, size) are likely to be polygenic (Santure and Garant  
448 2018). Specifically, body size has been found to be polygenic in a variety of taxa, including  
449 Soay sheep (Bérénos et al. 2015), bighorn sheep (Miller, Festa-Bianchet, and Coltman 2018),  
450 and polar bears (Malenfant et al. 2018). Antler shape has been found to be polygenic in  
451 Scottish red deer (Peters et al. in prep). Altogether, it seems unlikely that the 60 SNPs we  
452 have identified here would have large impacts on the phenotypic traits of interest that policy  
453 makers would seek to conserve in Scottish red deer.

454

455 Genomic clines can be used to identify loci with extreme introgression. However, genomic  
456 clines cannot be used to identify definitively alleles under selection (Gompert and Buerkle  
457 2012, Gompert and Buerkle 2011), so different methods must be employed to distinguish  
458 between alleles undergoing adaptive introgression or involved in reproductive isolation and  
459 those loci that deviate from genomic expectations due to stochastic processes. One approach

460 would be to study replicate hybrid zones, on the assumption that stochastic processes will act  
461 independently in each instance of secondary contact, but selection will not. Loci which have  
462 consistent excess  $\beta$  estimates would be the best candidates for being under selection, either  
463 for or against introgression into a novel background. In house mice, it was found that 28/41  
464 SNPs had different genomic clines between two replicates, as assessed using a likelihood  
465 ratio test that compared the clines, encompassing both  $\alpha$  and  $\beta$ , suggesting that few if any of  
466 the extreme SNPs could be related to genetic incompatibilities or adaptive introgression  
467 (Teeter et al. 2010). While it should be noted that detecting signals of even very strong  
468 selection at the genome wide level is extremely difficult, requires substantial power and a  
469 strong signal (Castro et al. 2019), those SNPs with extreme  $\beta$  across multiple replicate hybrid  
470 zones would be strong candidates for being involved in either adaptive introgression, or  
471 impeding gene flow between species. Future research on red deer x sika hybridization could  
472 capitalize on replicate hybrid areas across Europe (e.g. Ireland (Smith et al. 2014), Lithuania  
473 (Ražanskė, Gibiežaitė, and Paulauskas 2017), and Poland (Biedrzycka, Solarz, and Okarma  
474 2012)) where the many points of sika introduction have generated natural replications of this  
475 cross where selection may occur.

476

477 **Data Availability:** all data and code are available at [https://figshare.com/projects/Locus-](https://figshare.com/projects/Locus-specific_introgression_in_young_hybrid_swarms_drift_dominates_selection/76473)  
478 [specific\\_introgression\\_in\\_young\\_hybrid\\_swarms\\_drift\\_dominates\\_selection/76473](https://figshare.com/projects/Locus-specific_introgression_in_young_hybrid_swarms_drift_dominates_selection/76473)

479

#### 480 **Acknowledgements:**

481 We thank the Forestry and Land Scotland rangers, especially Fraser Robinson and Kevin  
482 McKillop for collecting samples, the Wellcome Trust Clinical Research Facility Genetics  
483 Core, Edinburgh for performing the genotyping and Paul Fisher and Rudi Brauning for SNP  
484 array development. We're also grateful to Nick Barton and Stuart Baird for discussions about  
485 the null expectation of genomic clines, as well as Alana Alexander, Zachary Gompert,  
486 Elizabeth Mandeville and Piotr Zieliński for assistance with and discussion of *bgc*. This  
487 project was funded by a European Research Council Advanced Grant to JMP, a  
488 Vetenskapsrådet (Swedish Research Council) International Postdoc Fellowship to SEM and  
489 Natural Environment Research Council PhD Studentships to HVS and SLS.

490

491 **Figures:**

492 Figure 1a: Frequency of SNPs within 0.05  $F_{st}$  bins, estimated using pure sika and red deer

493 (see text).

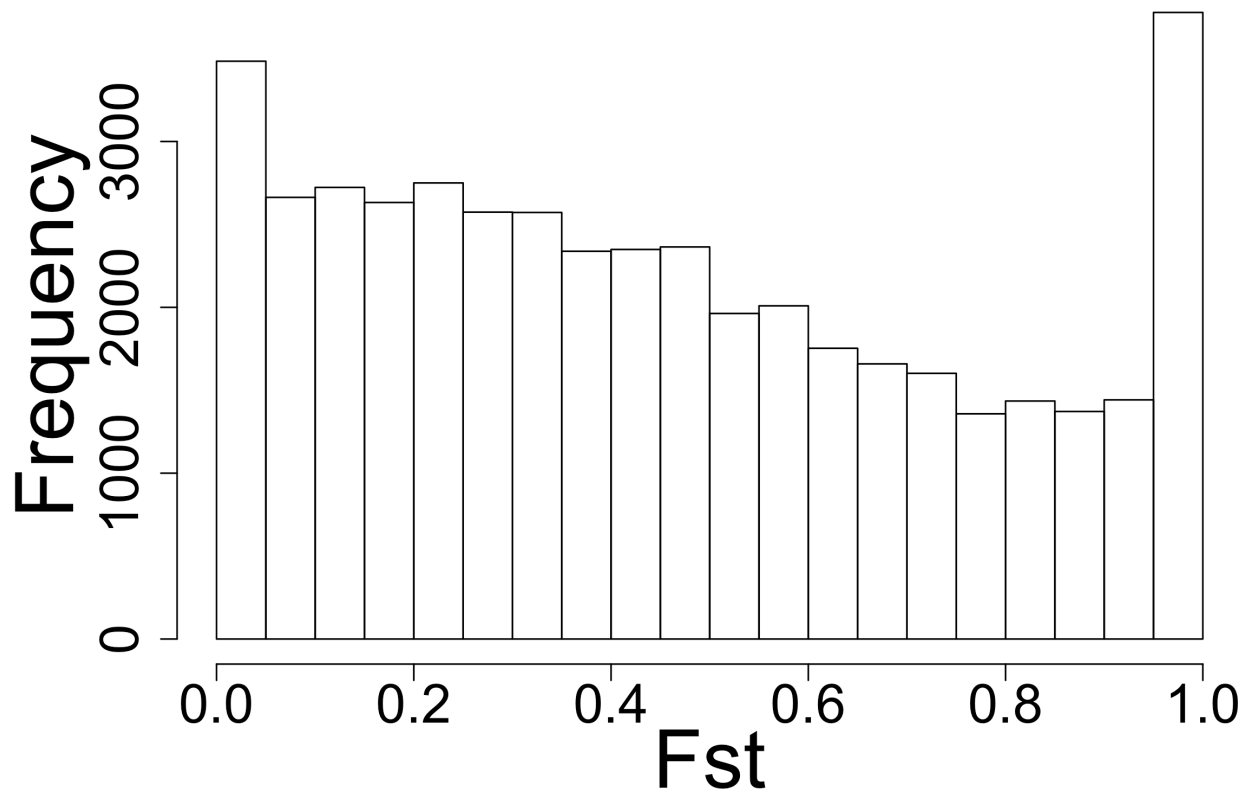

494

495



496 Figure 1b: Boxplot showing  $F_{st}$  between red deer and sika on each (bovine) chromosome.

497 Each box shows the median, 25<sup>th</sup> and 75<sup>th</sup> percentile for each chromosome and each

498 whisker extends to 5<sup>th</sup> and 95<sup>th</sup> percentile.

499

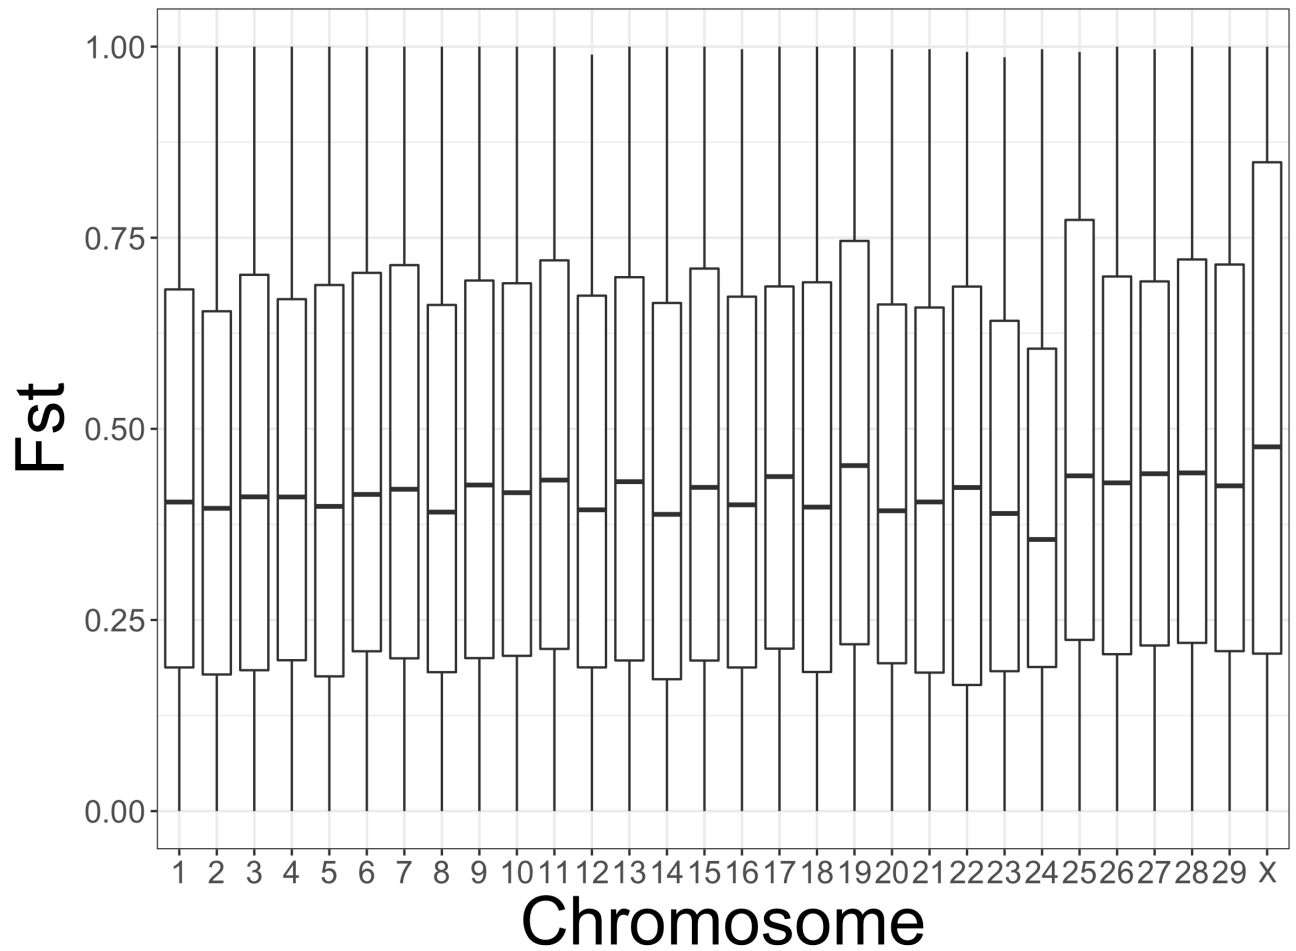

500

501

502 Figure 2 a –  $\alpha$  estimates with 95% credible intervals for SNPs significantly different from  
503 zero ('excess'), from a bgc analysis of a red deer x sika hybrid swarm in Kintyre, Scotland.  $\alpha$   
504 =0 can be interpreted as the genomic cline center, positive  $\alpha$  estimates indicate alleles that are  
505 more shifted from red deer into sika than the genome wide expectation, and negative  $\alpha$ s  
506 indicate alleles shifted from sika into red deer.

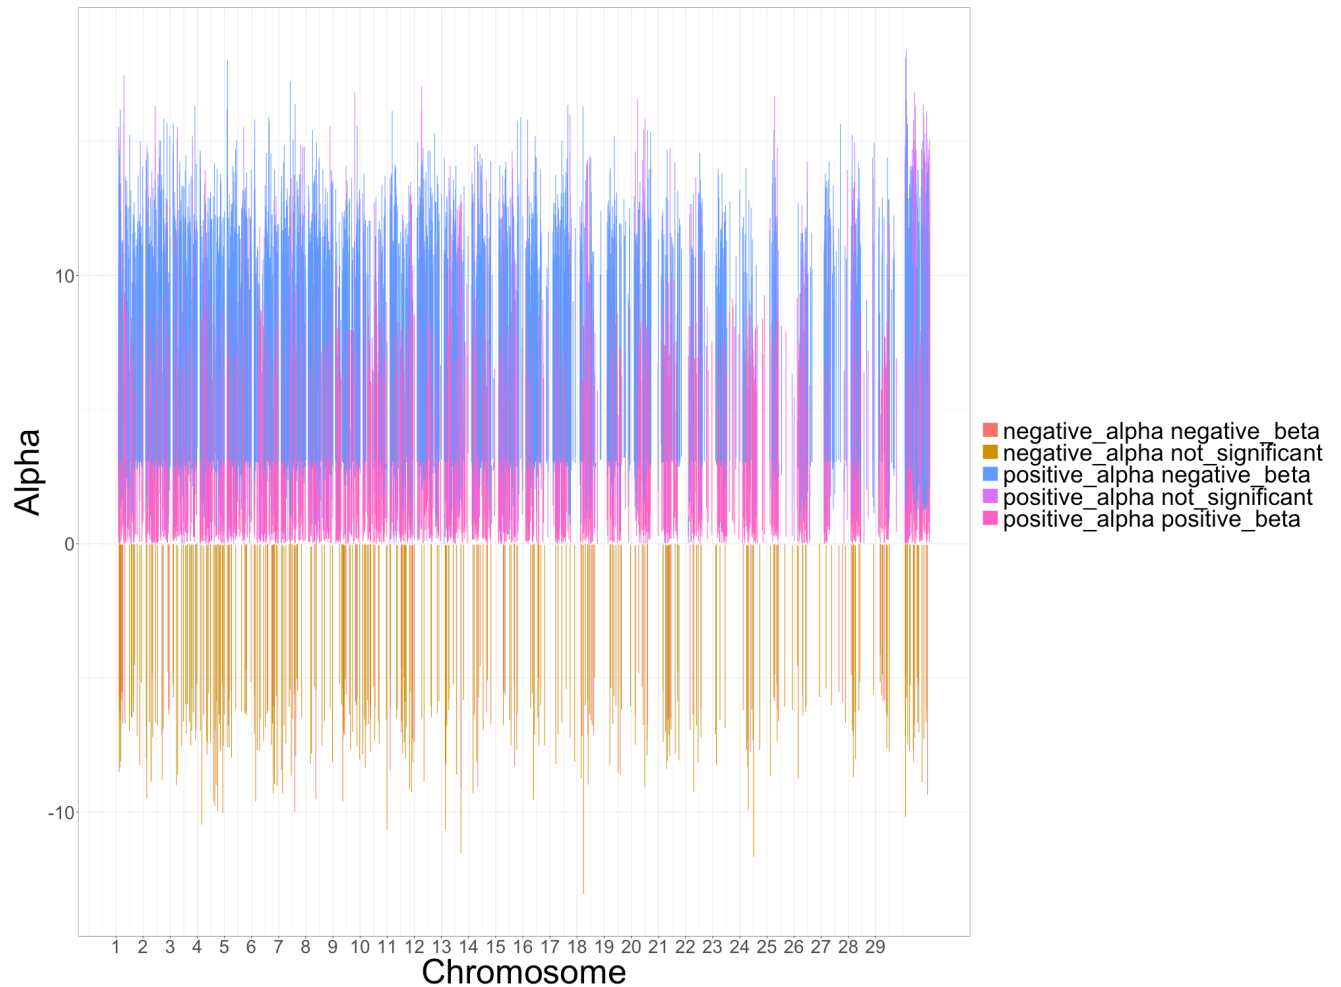

509 Figure 2b –  $\beta$  estimates with 95% credible intervals for SNPs significantly different from  
510 zero ('excess'), from a bgc analysis of a red deer x sika hybrid swarm in Kintyre, Scotland.  $\beta$   
511 =0 can be interpreted as the average rate of introgression, positive  $\beta$  estimates are indicative  
512 of a narrow cline, and slow introgression, while negative  $\beta$  estimates are analogous to faster  
513 than average introgression.

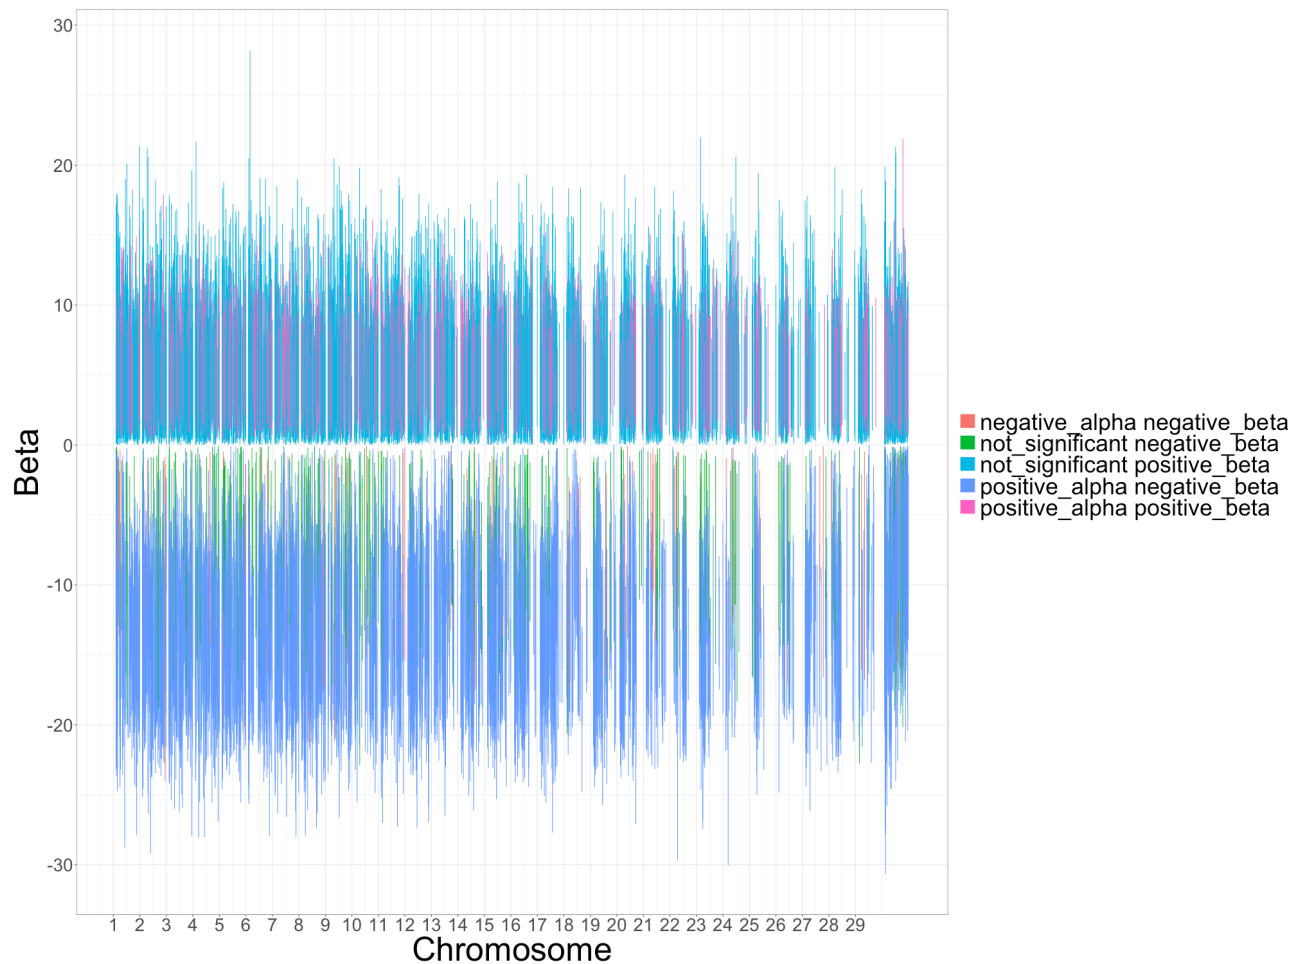

516 **Figure 3:** We used SLiM (Haller and Messer 2017) to simulate admixing populations that  
 517 had been in secondary contact for either a short (s, 10 generations, top row), medium (m, 100  
 518 generations, middle row), or long (l, 1000 generations, bottom row) length of time since  
 519 admixture started. For each length of secondary contact, we also simulated rates of migration  
 520 and interbreeding between populations, as either low (l, 0.002, left two columns), medium  
 521 (m, 0.02, middle two columns), or high (h, 0.2, right two columns), and the abundance ratio  
 522 of each pure population, as either even (e, 1:1) or odd (o, 1:3). Each simulation was run 50  
 523 times, no selection was simulated, and we categorized (into nine categories; legend) the  
 524 direction and rate of introgression among simulated hybrid individuals using *bgc*. Overall,  
 525 introgression at most loci did not deviate from genome-wide expectation, but especially in  
 526 cases with a short time since admixture started and a low rate of admixture (top, left two  
 527 panels), many loci introgressed faster than genome-wide expectation despite the total absence  
 528 of any selection in the simulations.

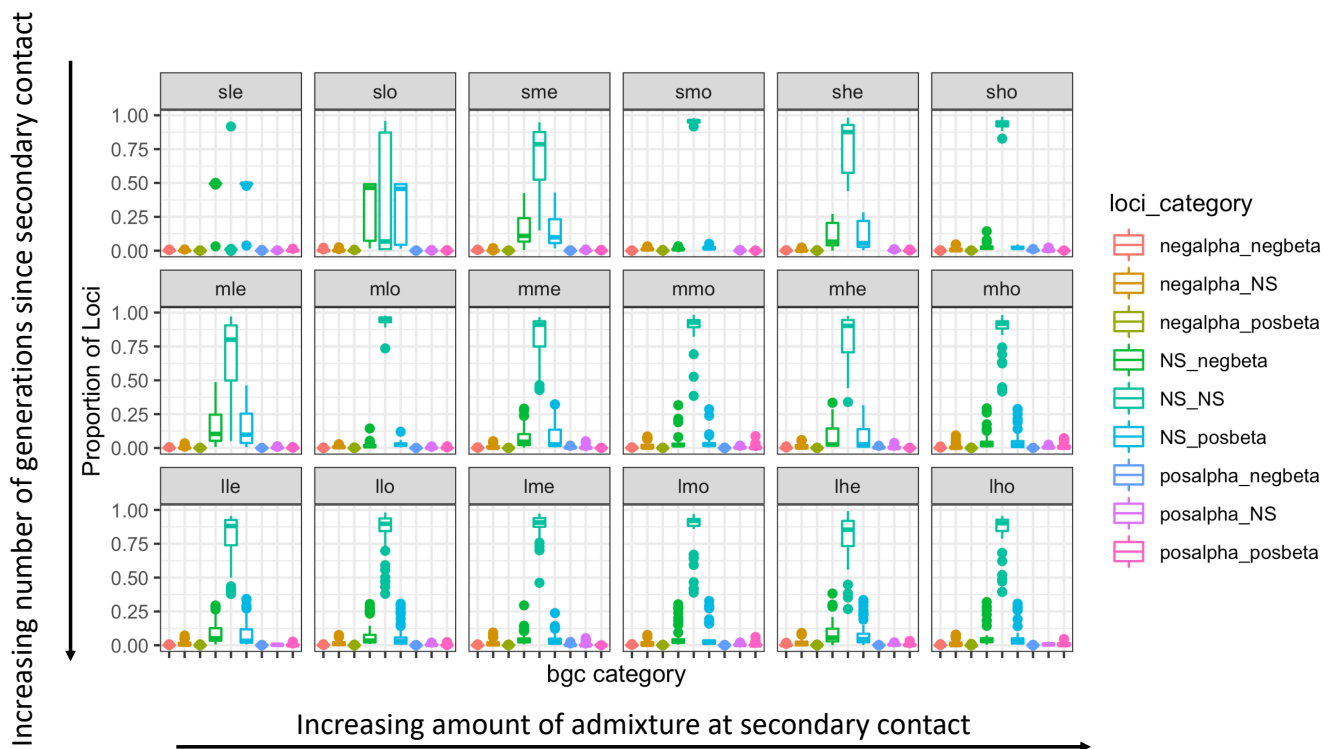

529

530

531

532 **Tables:**

533 Table 1: Using bgc in a red deer x sika hybrid population we categorized 44997 SNPs, and a  
 534 subset of 3793 diagnostic and ancestry informative markers (AIMs) depending on the  
 535 estimated center of a genomic cline ( $\alpha$ ) and rate of movement across a genomic cline ( $\beta$ ). A  
 536 SNP was considered significantly excess if the 95% confidence interval did not overlap zero,  
 537 and considered an outlier if the point estimate was not within the 95% distribution for the  
 538 overall genome.

| $\alpha$ category | $\beta$ category | Introgression interpretation | 45K SNPs           |               | AIM                |              |
|-------------------|------------------|------------------------------|--------------------|---------------|--------------------|--------------|
|                   |                  |                              | Excess CI $\neq$ 0 | 95% outlier   | Excess CI $\neq$ 0 | 95% outlier  |
| negative          | negative         | Fast into red deer           | 60 (0.001)         | 0 (0.000)     | 2 (0.001)          | 0 (0.000)    |
| negative          | not significant  | Into red deer                | 324 (0.007)        | 1 (0.000)     | 5 (0.001)          | 0 (0.000)    |
| negative          | positive         | Slow into red deer           | 0 (0.000)          | 0 (0.000)     | 0 (0.000)          | 0 (0.000)    |
| not significant   | negative         | Fast in both directions      | 255 (0.006)        | 568 (0.013)   | 14 (0.004)         | 309 (0.081)  |
| not significant   | not significant  | Not significant              | 36386 (0.809)      | 40701 (0.905) | 1165 (0.307)       | 1309 (0.341) |
| not significant   | positive         | Slow in both directions      | 3228 (0.072)       | 110 (0.002)   | 73 (0.019)         | 4 (0.001)    |
| positive          | negative         | Fast into sika               | 3034 (0.067)       | 2438 (0.054)  | 2285 (0.602)       | 1870 (0.487) |
| positive          | not significant  | Into sika                    | 367 (0.008)        | 1167 (0.026)  | 221 (0.058)        | 346 (0.090)  |
| positive          | positive         | Slow into sika               | 1343 (0.030)       | 12 (0.000)    | 28 (0.007)         | 0 (0.000)    |

539

540

541 **Works Cited:**

- 542 Allendorf, Fred W, Robb F Leary, Paul Spruell, and John K Wenburg. 2001. "The problems  
543 with hybrids: setting conservation guidelines." *Trends in ecology & evolution* 16  
544 (11):613-622.
- 545 Allendorf, Fred W, and Gordon Luikart. 2009. *Conservation and the genetics of populations*:  
546 John Wiley & Sons.
- 547 Arnold, Michael L, Mark R Bulger, John M Burke, Alice L Hempel, and Joseph H Williams.  
548 1999. "Natural hybridization: how low can you go and still be important?" *Ecology*  
549 80 (2):371-381.
- 550 Baack, Eric J, and Loren H Rieseberg. 2007. "A genomic view of introgression and hybrid  
551 speciation." *Current opinion in genetics & development* 17 (6):513-518.
- 552 Baird, SJE, NH Barton, and AM Etheridge. 2003. "The distribution of surviving blocks of an  
553 ancestral genome." *Theoretical population biology* 64 (4):451-471.
- 554 Barton, N H, and G M Hewitt. 1985. "Analysis of hybrid zones." *Ann. Rev. Ecol. Syst.*  
555 16:113-148.
- 556 Barton, NICHOLAS H, and KATHERINE S Gale. 1993. "Genetic analysis of hybrid zones."  
557 *Hybrid zones and the evolutionary process*:13-45.
- 558 Biedrzycka, Aleksandra, Wojciech Solarz, and Henryk Okarma. 2012. "Hybridization  
559 between native and introduced species of deer in Eastern Europe." *Journal of*  
560 *Mammalogy* 93 (5):1331-1341.
- 561 Brauning, Rudiger, Paul J Fisher, Alan F McCulloch, Russell J Smithies, James F Ward,  
562 Matthew J Bixley, Cindy T Lawley, Suzanne J Rowe, and John C McEwan. 2015.  
563 "Utilization of high throughput genome sequencing technology for large scale single  
564 nucleotide polymorphism discovery in red deer and Canadian elk." *bioRxiv*:027318.
- 565 Buerkle, C Alex, and Christian Lexer. 2008. "Admixture as the basis for genetic mapping."  
566 *Trends in Ecology & Evolution* 23 (12):686-694.
- 567 Burri, Reto, Alexander Nater, Takeshi Kawakami, Carina F Mugal, Pall I Olason, Linnea  
568 Smeds, Alexander Suh, Ludovic Dutoit, Stanislav Bureš, and Laszlo Z Garamszegi.  
569 2015. "Linked selection and recombination rate variation drive the evolution of the  
570 genomic landscape of differentiation across the speciation continuum of *Ficedula*  
571 flycatchers." *Genome research* 25 (11):1656-1665.
- 572 Béréros, Camillo, Philip A Ellis, Jill G Pilkington, S Hong Lee, Jake Gratten, and Josephine  
573 M Pemberton. 2015. "Heterogeneity of genetic architecture of body size traits in a  
574 free-living population." *Molecular ecology* 24 (8):1810-1830.
- 575 Castro, João PL, Michelle N Yancoskie, Marta Marchini, Stefanie Belohlavy, Layla  
576 Hiramatsu, Marek Kučka, William H Beluch, Ronald Naumann, Isabella Skuplik, and  
577 John Cobb. 2019. "An integrative genomic analysis of the Longshanks selection  
578 experiment for longer limbs in mice." *elife* 8:e42014.
- 579 Charlesworth, Brian. 1998. "Measures of divergence between populations and the effect of  
580 forces that reduce variability." *Molecular biology and evolution* 15 (5):538-543.
- 581 Cruickshank, Tami E, and Matthew W Hahn. 2014. "Reanalysis suggests that genomic  
582 islands of speciation are due to reduced diversity, not reduced gene flow." *Molecular*  
583 *ecology* 23 (13):3133-3157.
- 584 Dobzhansky, T. 1937. "Genetics and the origin of species."374.
- 585 Gompert, Z, and CA Buerkle. 2012. "bgc: software for Bayesian estimation of genomic  
586 clines." *Molecular Ecology Resources* 12 (6):1168-1176.
- 587 Gompert, Zachariah, and C Alex Buerkle. 2009. "A powerful regression-based method for  
588 admixture mapping of isolation across the genome of hybrids." *Molecular Ecology*  
589 18 (6):1207-1224.

- 590 Gompert, Zachariah, and C Alex Buerkle. 2011. "Bayesian estimation of genomic clines."  
591 *Molecular Ecology* 20 (10):2111-2127.
- 592 Goodman, Simon J, Nick H Barton, Graeme Swanson, Kate Abernethy, and Josephine M  
593 Pemberton. 1999. "Introgression through rare hybridization: a genetic study of a  
594 hybrid zone between red and sika deer (genus *Cervus*) in Argyll, Scotland." *Genetics*  
595 152 (1):355-371.
- 596 Goudet, Jérôme. 2005. "Hierfstat, a package for R to compute and test hierarchical F-  
597 statistics." *Molecular Ecology Notes* 5 (1):184-186.
- 598 Grabenstein, Kathryn C, and Scott A Taylor. 2018. "Breaking Barriers: Causes,  
599 Consequences, and Experimental Utility of Human-Mediated Hybridization." *Trends*  
600 *in Ecology & Evolution*.
- 601 Haines, Margaret L, Gordon Luikart, Stephen J Amish, Seth Smith, and Emily K Latch.  
602 2019. "Evidence for adaptive introgression of exons across a hybrid swarm in deer."  
603 *BMC evolutionary biology* 19 (1):199.
- 604 Haller, Benjamin C, and Philipp W Messer. 2017. "SLiM 2: Flexible, interactive forward  
605 genetic simulations." *Molecular biology and evolution* 34 (1):230-240.
- 606 Hamilton, Jill A, and Joshua M Miller. 2016. "Adaptive introgression as a resource for  
607 management and genetic conservation in a changing climate." *Conservation Biology*  
608 30 (1):33-41.
- 609 Hedrick, Philip W. 2013. "Adaptive introgression in animals: examples and comparison to  
610 new mutation and standing variation as sources of adaptive variation." *Molecular*  
611 *ecology* 22 (18):4606-4618.
- 612 Hewitt, Godfrey M. 1988. "Hybrid zones-natural laboratories for evolutionary studies."  
613 *Trends in Ecology & Evolution* 3 (7):158-167.
- 614 Huisman, Jisca, Loeske EB Kruuk, Philip A Ellis, Tim Clutton-Brock, and Josephine M  
615 Pemberton. 2016. "Inbreeding depression across the lifespan in a wild mammal  
616 population." *Proceedings of the National Academy of Sciences* 113 (13):3585-3590.
- 617 IUCN. 2020. IUCN Red List of Threatened Species. Version 2020.1. < [www.iucnredlist.org](http://www.iucnredlist.org)  
618 >.
- 619 Janoušek, Václav, Pavel Munclinger, Liuyang Wang, Katherine C Teeter, and Priscilla K  
620 Tucker. 2015. "Functional organization of the genome may shape the species  
621 boundary in the house mouse." *Molecular biology and evolution* 32 (5):1208-1220.
- 622 Johnston, Susan E, Jisca Huisman, Philip A Ellis, and Josephine M Pemberton. 2017. "A  
623 high-density linkage map reveals sexually-dimorphic recombination landscapes in red  
624 deer (*Cervus elaphus*)." *G3: Genes, Genomes, Genetics* 8 (7):2265-2276.
- 625 Kardos, Marty, and Aaron BA Shafer. 2018. "The peril of gene-targeted conservation."  
626 *Trends in ecology & evolution* 33 (11):827-839.
- 627 Lexer, C, CA Buerkle, JA Joseph, B Heinze, and MF Fay. 2007. "Admixture in European  
628 *Populus* hybrid zones makes feasible the mapping of loci that contribute to  
629 reproductive isolation and trait differences." *Heredity* 98 (2):74-84.
- 630 Loh, Po-Ru, Mark Lipson, Nick Patterson, Priya Moorjani, Joseph K Pickrell, David Reich,  
631 and Bonnie Berger. 2013. "Inferring admixture histories of human populations using  
632 linkage disequilibrium." *Genetics* 193 (4):1233-1254.
- 633 Malenfant, René M, Corey S Davis, Evan S Richardson, Nicholas J Lunn, and David W  
634 Coltman. 2018. "Heritability of body size in the polar bears of Western Hudson Bay."  
635 *Molecular ecology resources* 18 (4):854-866.
- 636 Mallet, James, Nick Barton, Gerard Lamas, Jose Santisteban, Manuel Muedas, and H Eeley.  
637 1990. "Estimates of selection and gene flow from measures of cline width and linkage  
638 disequilibrium in *Heliconius* hybrid zones." *Genetics* 124 (4):921-936.

- 639 McFarlane, S Eryn, Darren C Hunter, Helen V Senn, Stephanie L Smith, Rebecca Holland,  
640 Jisca Huisman, and Josephine M Pemberton. 2020. "Increased genetic marker density  
641 reveals high levels of admixture between red deer and introduced Japanese sika in  
642 Kintyre, Scotland." *Evolutionary Applications* 13 (2):432-441.
- 643 McFarlane, S Eryn, and Josephine M Pemberton. 2019. "Detecting the true extent of  
644 introgression during anthropogenic hybridization." *Trends in ecology & evolution* 34  
645 (4):315-326.
- 646 Miller, Joshua M, Marco Festa-Bianchet, and David W Coltman. 2018. "Genomic analysis of  
647 morphometric traits in bighorn sheep using the Ovine Infinium® HD SNP  
648 BeadChip." *PeerJ* 6:e4364.
- 649 Muller, Hermann J. 1940. "Bearing of the Drosophila work on systematics." *The new  
650 systematics*:185-268.
- 651 Nei, Masatoshi. 1987. *Molecular evolutionary genetics*: Columbia university press.
- 652 Oswald, Jessica A, Michael G Harvey, Rosalind C Remsen, DePaul U Foxworth, Donna L  
653 Dittmann, Steven W Cardiff, and Robb T Brumfield. 2019. "Evolutionary dynamics  
654 of hybridization and introgression following the recent colonization of Glossy Ibis  
655 (Aves: Plegadis falcinellus) into the New World." *Molecular ecology* 28 (7):1675-  
656 1691.
- 657 Parchman, TL, Z Gompert, Michael J Braun, RT Brumfield, DB McDonald, JAC Uy, G  
658 Zhang, ED Jarvis, BA Schlinger, and CA Buerkle. 2013. "The genomic consequences  
659 of adaptive divergence and reproductive isolation between species of manakins."  
660 *Molecular ecology* 22 (12):3304-3317.
- 661 Parmesan, Camille, and Gary Yohe. 2003. "A globally coherent fingerprint of climate change  
662 impacts across natural systems." *Nature* 421 (6918):37-42.
- 663 Peters, Lucy, Jisca Huisman, Loeske EB Kruuk, Josephine M Pemberton, and Susan E  
664 Johnston. in prep. "Antler morphology has a polygenic genetic architecture in wild  
665 red deer ( *Cervus elaphus* )."
- 666 Petit, Rémy J. 2004. "Biological invasions at the gene level." *Diversity and Distributions* 10  
667 (3):159-165.
- 668 Powerscourt, Viscount. 1884. "On the Acclimatization of the Japanese Deer at Powerscourt."  
669 *Proceedings of the Zoological Society of London*:207-209.
- 670 Pulido-Santacruz, Paola, Alexandre Aleixo, and Jason T Weir. 2018. "Morphologically  
671 cryptic Amazonian bird species pairs exhibit strong postzygotic reproductive  
672 isolation." *Proceedings of the Royal Society B: Biological Sciences* 285  
673 (1874):20172081.
- 674 Purcell, S, B Neale, K Todd-Brown, L Thomas, MAR Ferreira, D Bender, J Maller, P Sklar,  
675 PIW de Bakker, MJ Daly, and PC Sham. 2007. "PLINK: a toolset for whole-genome  
676 association and population-based linkage analysis." *American Journal of Human  
677 Genetics* 81.
- 678 Ratcliffe, PR. 1987. "Distribution and current status of sika deer, *Cervus nippon*, in Great  
679 Britain." *Mammal Review* 17 (1):39-58.
- 680 Ražanskė, Irma, Justina Monika Gibiežaitė, and Algimantas Paulauskas. 2017. "Genetic  
681 analysis of red deer (*Cervus elaphus*) and sika deer (*Cervus nippon*) to evaluate  
682 possible hybridisation in Lithuania." *Baltic forestry. Girionys: Lietuvos miškų  
683 institutas, 2017, vol. 23, no. 3.*
- 684 Rhymer, Judith M, and Daniel Simberloff. 1996. "Extinction by hybridization and  
685 introgression." *Annual Review of Ecology and Systematics*:83-109.
- 686 Royer, Anne M, Matthew A Streisfeld, and Christopher Irwin Smith. 2016. "Population  
687 genomics of divergence within an obligate pollination mutualism: Selection maintains



- 688 differences between Joshua tree species." *American journal of botany* 103 (10):1730-  
689 1741.
- 690 Santure, Anna W, and Dany Garant. 2018. "Wild GWAS—association mapping in natural  
691 populations." *Molecular ecology resources* 18 (4):729-738.
- 692 Scottish Wildlife Trust. 2013. [https://scottishwildlifetrust.org.uk/news/can-you-spot-all-of-](https://scottishwildlifetrust.org.uk/news/can-you-spot-all-of-scotlands-big-5/#:~:text='Scotland's%20Big%205'%20celebrates%20the,animals%20in%20their%20natural%20habitat)  
693 [scotlands-big-](https://scottishwildlifetrust.org.uk/news/can-you-spot-all-of-scotlands-big-5/#:~:text='Scotland's%20Big%205'%20celebrates%20the,animals%20in%20their%20natural%20habitat)  
694 [5/#:~:text='Scotland's%20Big%205'%20celebrates%20the,animals%20in%20their%20](https://scottishwildlifetrust.org.uk/news/can-you-spot-all-of-scotlands-big-5/#:~:text='Scotland's%20Big%205'%20celebrates%20the,animals%20in%20their%20natural%20habitat)  
695 [Onatural%20habitat](https://scottishwildlifetrust.org.uk/news/can-you-spot-all-of-scotlands-big-5/#:~:text='Scotland's%20Big%205'%20celebrates%20the,animals%20in%20their%20natural%20habitat). Accessed 16.09.2020.
- 696 Senn, Helen V, Nick H Barton, Simon J Goodman, GM Swanson, KA Abernethy, and  
697 Josephine M Pemberton. 2010. "Investigating temporal changes in hybridization and  
698 introgression in a predominantly bimodal hybridizing population of invasive sika  
699 (*Cervus nippon*) and native red deer (*C. elaphus*) on the Kintyre Peninsula, Scotland."  
700 *Molecular Ecology* 19 (5):910-924.
- 701 Senn, Helen V, and Josephine M Pemberton. 2009. "Variable extent of hybridization between  
702 invasive sika (*Cervus nippon*) and native red deer (*C. elaphus*) in a small geographical  
703 area." *Molecular ecology* 18 (5):862-876.
- 704 Senn, Helen V, Graeme M Swanson, Simon J Goodman, Nicholas H Barton, and Josephine  
705 M Pemberton. 2010. "Phenotypic correlates of hybridisation between red and sika  
706 deer (genus *Cervus*)." *Journal of Animal Ecology* 79 (2):414-425.
- 707 Smith, Stephanie L, Ruth F Carden, Barry Coad, Timothy Birkitt, and Josephine M  
708 Pemberton. 2014. "A survey of the hybridisation status of *Cervus* deer species on the  
709 island of Ireland." *Conservation Genetics* 15 (4):823-835.
- 710 Smith, Stephanie L, Helen V Senn, Sílvia Pérez-Espona, Megan T Wyman, Elizabeth Heap,  
711 and Josephine M Pemberton. 2018a. "Introgression of exotic *Cervus* (*nippon* and  
712 *canadensis*) into red deer (*Cervus elaphus*) populations in Scotland and the English  
713 Lake District." *Ecology and Evolution* 8 (4):2122-2134.
- 714 Smith, Stephanie L, Helen V Senn, Sílvia Pérez-Espona, Megan T Wyman, Elizabeth Heap,  
715 and Josephine M Pemberton. 2018b. "Introgression of exotic *Cervus* (*nippon* and  
716 *canadensis*) into red deer (*Cervus elaphus*) populations in Scotland and the English  
717 Lake District." *Ecology and Evolution*.
- 718 Souissi, Ahmed, François Bonhomme, Manuel Machado, Lilia Bahri-Sfar, and Pierre-  
719 Alexandre Gagnaire. 2018. "Genomic and geographic footprints of differential  
720 introgression between two divergent fish species (*Solea* spp.)." *Heredity* 121 (6):579-  
721 593.
- 722 Sung, Cheng-Jung, Katherine L Bell, Chris C Nice, and Noland H Martin. 2018. "Integrating  
723 Bayesian genomic cline analyses and association mapping of morphological and  
724 ecological traits to dissect reproductive isolation and introgression in a Louisiana Iris  
725 hybrid zone." *Molecular ecology* 27 (4):959-978.
- 726 Taylor, Scott A, Robert L Curry, Thomas A White, Valentina Ferretti, and Irby Lovette.  
727 2014. "Spatiotemporally consistent genomic signatures of reproductive isolation in a  
728 moving hybrid zone." *Evolution* 68 (11):3066-3081.
- 729 Taylor, Scott A, and Erica L Larson. 2019. "Insights from genomes into the evolutionary  
730 importance and prevalence of hybridization in nature." *Nature ecology & evolution* 3  
731 (2):170-177.
- 732 Team, R Core. 2013. "R: A language and environment for statistical computing." *R*  
733 *Foundation for Statistical Computing, Vienna, Austria*. URL [http://www.R-](http://www.R-project.org/)  
734 [project.org/](http://www.R-project.org/).
- 735 Teeter, Katherine C, Lisa M Thibodeau, Zachariah Gompert, C Alex Buerkle, Michael W  
736 Nachman, and Priscilla K Tucker. 2010. "The variable genomic architecture of

- 737 isolation between hybridizing species of house mice." *Evolution: International*  
738 *Journal of Organic Evolution* 64 (2):472-485.
- 739 Todesco, Marco, Mariana A Pascual, Gregory L Owens, Katherine L Ostevik, Brook T  
740 Moyers, Sariel Hübner, Sylvia M Heredia, Min A Hahn, Celine Caseys, and Dan G  
741 Bock. 2016. "Hybridization and extinction." *Evolutionary applications* 9 (7):892-  
742 908.
- 743 Trier, Cassandra N, Jo S Hermansen, Glenn-Peter Sætre, and Richard I Bailey. 2014.  
744 "Evidence for mito-nuclear and sex-linked reproductive barriers between the hybrid  
745 Italian sparrow and its parent species." *PLoS genetics* 10 (1):e1004075.  
746  
747

748 **Supplementary Material**

749 **Supplementary Table S1: Comparison of Fst on the X chromosome to other chromosomes.**

750 SNPs on the X chromosome have significantly higher Fst's than SNPs on all the  
751 autosomes with the exception of chromosome 25.

| Chromosome  | Estimate | Std. Error | t value | p value    |
|-------------|----------|------------|---------|------------|
| (Intercept) | 0.510    | 0.01       | 81.784  | < 2.00E-16 |
| 1           | -0.064   | 0.01       | -7.607  | 2.86E-14   |
| 2           | -0.079   | 0.01       | -9.024  | < 2.00E-16 |
| 3           | -0.059   | 0.01       | -6.457  | 1.08E-10   |
| 4           | -0.067   | 0.01       | -7.498  | 6.58E-14   |
| 5           | -0.068   | 0.01       | -7.552  | 4.37E-14   |
| 6           | -0.053   | 0.01       | -5.85   | 4.96E-09   |
| 7           | -0.050   | 0.01       | -5.419  | 6.02E-08   |
| 8           | -0.075   | 0.01       | -8.145  | 3.89E-16   |
| 9           | -0.052   | 0.01       | -5.501  | 3.79E-08   |
| 10          | -0.061   | 0.01       | -6.358  | 2.06E-10   |
| 11          | -0.039   | 0.01       | -4.161  | 3.18E-05   |
| 12          | -0.074   | 0.01       | -7.31   | 2.71E-13   |
| 13          | -0.052   | 0.01       | -5.149  | 2.63E-07   |
| 14          | -0.079   | 0.01       | -7.817  | 5.54E-15   |
| 15          | -0.051   | 0.01       | -5.025  | 5.06E-07   |
| 16          | -0.073   | 0.01       | -7.084  | 1.42E-12   |
| 17          | -0.048   | 0.01       | -4.656  | 3.23E-06   |
| 18          | -0.063   | 0.01       | -5.724  | 1.05E-08   |
| 19          | -0.027   | 0.01       | -2.427  | 0.015245   |
| 20          | -0.070   | 0.01       | -6.641  | 3.15E-11   |
| 21          | -0.073   | 0.01       | -6.728  | 1.74E-11   |
| 22          | -0.066   | 0.01       | -5.78   | 7.52E-09   |
| 23          | -0.079   | 0.01       | -6.338  | 2.36E-10   |
| 24          | -0.104   | 0.01       | -9.235  | < 2.00E-16 |
| 25          | -0.021   | 0.01       | -1.612  | 0.106877   |
| 26          | -0.050   | 0.01       | -4.135  | 3.56E-05   |
| 27          | -0.047   | 0.01       | -3.581  | 0.000343   |
| 28          | -0.037   | 0.01       | -2.915  | 0.00356    |
| 29          | -0.045   | 0.01       | -3.626  | 0.000289   |

752

753

754 Supplementary Figure 1: We calculated the  $F_{st}$  between red deer and sika on the Kintyre  
755 peninsula using 44997 SNPs. We have plotted  $F_{st}$  across the map position of each  
756 chromosome, including the X chromosome. We used the bovine map positions and linkage  
757 map because many diagnostic and ancestry informative markers, which were not  
758 polymorphic in sika, were not mapped on the *Cervus* linkage map (Johnston et al. 2017). For  
759 this reason, we present only 29 autosomes, as cattle have 29 autosomes, although red deer  
760 have 33. Map positions have been constrained between 0 and 1 for graphical purposes only.

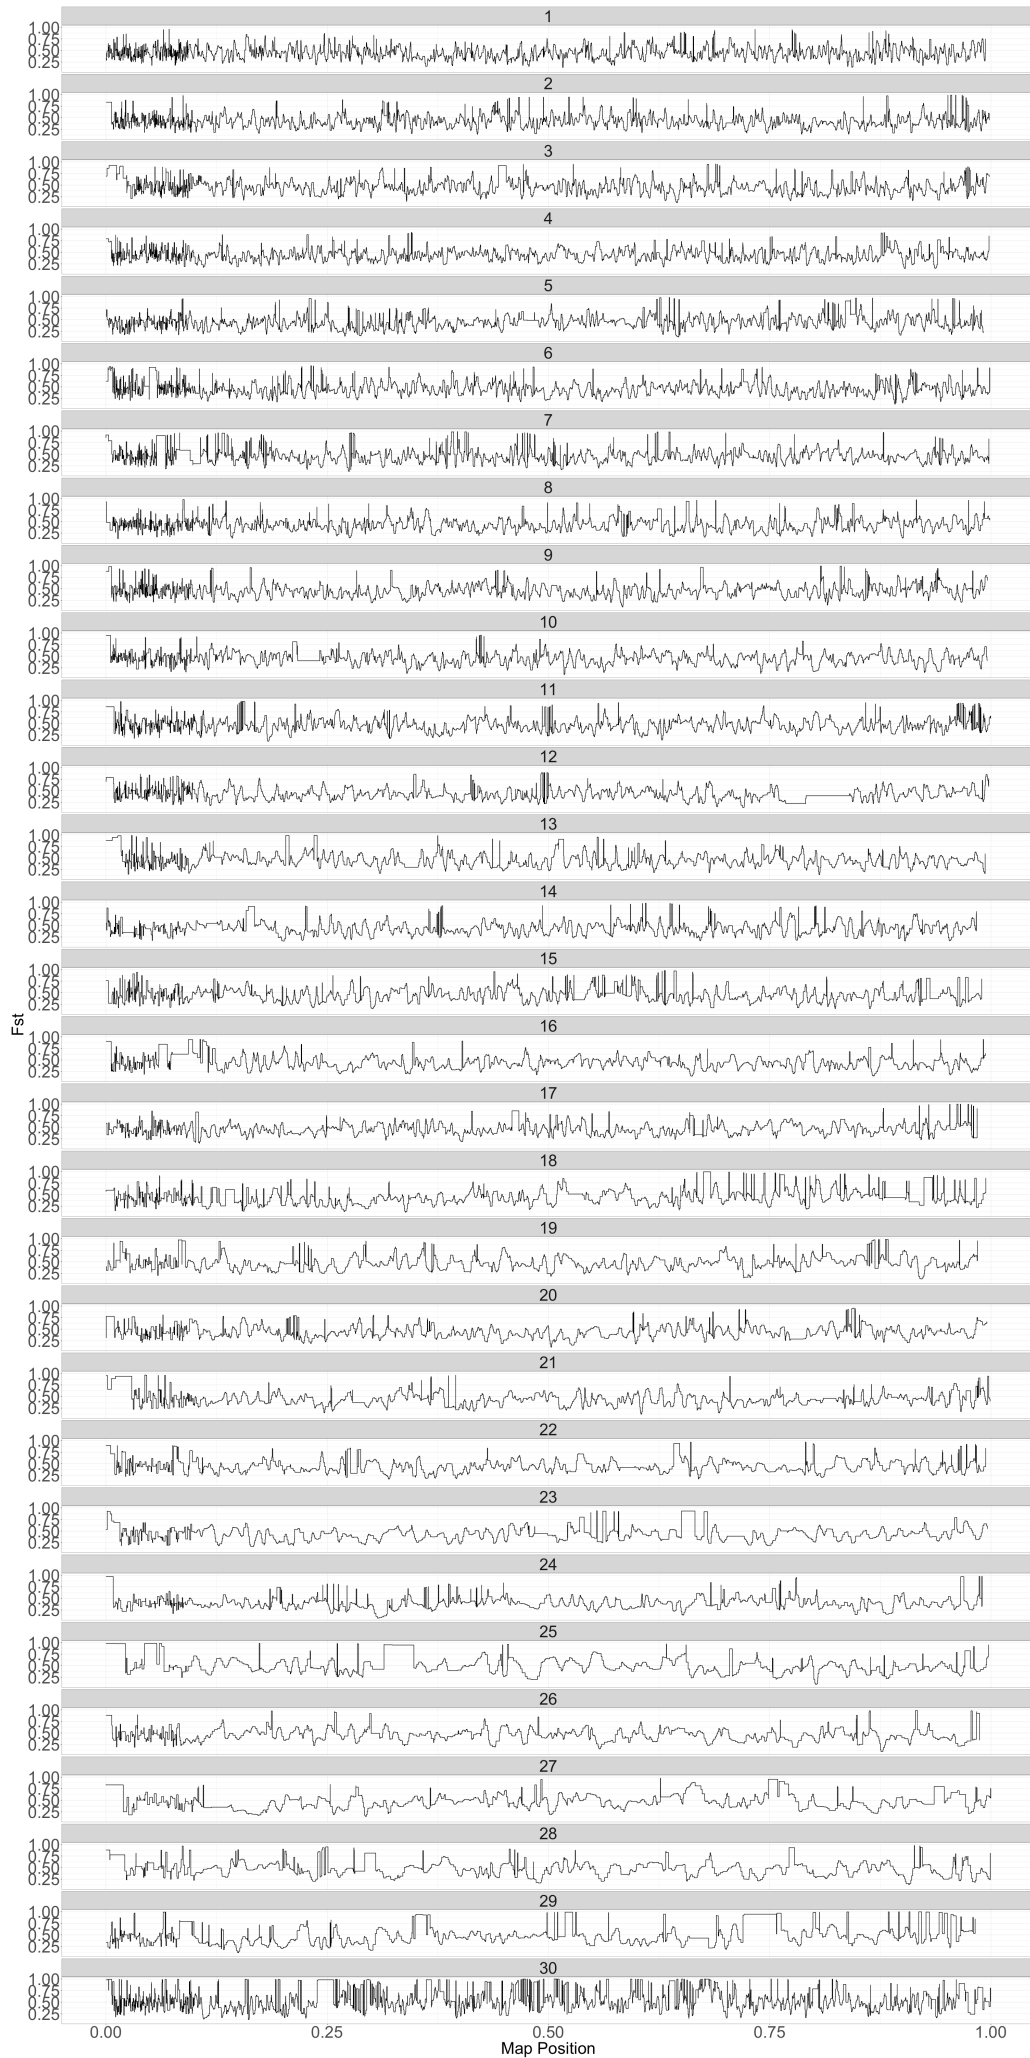

Source: http://biorxiv.org/content/10.1101/2020.09.17.300434v1.full.pdf
